# Supplementary material for: Rootstock Effect Influences the Phenolic and Sensory Characteristics of Syrah Grapes and Wines in a Mediterranean Climate
Source: MDPI journal article supplement (doi:10.3390/agronomy13102530), 2023-09-30
Supplement: s1 [file s1]

## Supplementary material

**Table S1.** Low-molecular-weight phenolic compounds in Syrah grape skins from rootstocks 5C and Gravesac

| Phenolic compounds        |                            | 5C              | GRAVESAC         |
|---------------------------|----------------------------|-----------------|------------------|
| Phenolic acids<br>(mg/kg) | Gallic acid                | 7.68 ± 0.17 a   | 6.81 ± 0.11 b    |
|                           | Syringic acid              | 5.12 ± 0.35     | 5.39 ± 0.19      |
|                           | Caffeic acid               | 6.52 ± 0.22     | 6.60 ± 0.34      |
|                           | <i>Cis</i> -ferulic acid   | 0.17 ± 0.09     | 0.49 ± 0.05      |
| Flavanols (mg/kg)         | Procyanidin 1              | 2.80 ± 0.17     | 2.91 ± 0.24      |
|                           | Methyl gallate             | 5.50 ± 0.19 a   | 4.75 ± 0.19 b    |
|                           | (+)-Catechin               | 13.98 ± 0.96 a  | 7.75 ± 1.34 b    |
|                           | Procyanidin 4              | 6.15 ± 0.17 b   | 7.60 ± 0.42 a    |
|                           | Procyanidin gallate        | 45.71 ± 4.44 b  | 66.25 ± 3.34 a   |
|                           | Procyanidin B1 gallate     | 5.02 ± 0.49 b   | 8.22 ± 0.30 a    |
|                           | Epicatechin gallate        | 10.61 ± 1.35    | 8.65 ± 0.82      |
| Flavonols (mg/kg)         | Astilbine derivative       | ND              | 2.96 ± 0.49      |
|                           | Rutine                     | 6.59 ± 0.83 b   | 12.88 ± 1.53 a   |
|                           | Astilbine                  | 9.82 ± 2.03     | 11.36 ± 0.89     |
|                           | Quercetin-3-O-galactoside  | 32.49 ± 2.57    | 38.34 ± 2.49     |
|                           | Quercetin-3-O-glucoside    | 64.22 ± 32.55 b | 216.80 ± 14.12 a |
|                           | Kaempferol-3-O-glucoside   | 9.85 ± 0.59 b   | 14.16 ± 0.90 a   |
|                           | Kaempferol-3-O-galactoside | 2.34 ± 0.07 b   | 14.97 ± 1.48 a   |
|                           | Kaempferol                 | 2.10 ± 0.19     | 1.91 ± 0.23      |
|                           | Isoramnetin-3-O-glucoside  | 41.57 ± 3.67    | 49.43 ± 5.80     |
| Stilbenes (mg/kg)         | Myricetin                  | 35.96 ± 2.61    | 29.36 ± 2.41     |
|                           | <i>Trans</i> -resveratrol  | 8.93 ± 0.74 b   | 16.20 ± 0.39 a   |

Values are expressed as mean ± standard error (n=5). Different lowercase letters indicate significant differences between rootstocks according to ANOVA ( $p < 0.05$ ).

**Table S2.** Low-molecular-weight phenolic compounds in Syrah grape seeds from rootstocks 5C and Gravesac

| Phenolic compounds        |                     | 5C              | GRAVESAC       |
|---------------------------|---------------------|-----------------|----------------|
| Phenolic acids<br>(mg/kg) | Gallic acid         | 29.54 ± 1.12    | 30.10 ± 2.36   |
|                           | Protocatechuic acid | 0.94 ± 0.22     | 1.99 ± 0.25    |
| Flavanols (mg/kg)         | Procyanidin B3      | 14.35 ± 1.67    | 13.61 ± 1.51   |
|                           | (+)-Catechin        | 274.21 ± 33.85  | 304.86 ± 37.97 |
|                           | Trimer procyanidin  | 11.44 ± 1.39    | 9.82 ± 0.48    |
|                           | Procyanidin B4      | 27.14 ± 2.13    | 23.77 ± 2.74   |
|                           | Procyanidin B2      | 72.26 ± 6.72    | 89.37 ± 14.05  |
|                           | (-)-Epicatechin     | 480.69 ± 125.99 | 534.87 ± 54.82 |
|                           | Dimer gallate 2     | 17.21 ± 2.44    | 13.21 ± 1.67   |
|                           | Trimer C1           | 11.40 ± 1.25    | ND             |
|                           | Procyanidin 2       | 312.55 ± 34.21  | 411.74 ± 63.05 |
|                           | Procyanidin 3       | 25.24 ± 5.66    | 26.06 ± 0.34   |
|                           | Trimer gallate      | 59.04 ± 10.44   | 43.81 ± 7.89   |
|                           | Procyanidin 4       | 20.97 ± 2.62    | 16.06 ± 2.47   |
|                           | Procyanidin B5      | 8.89 ± 0.84     | 9.17 ± 1.19    |
|                           | Procyanidin 5       | 12.61 ± 1.83    | 11.66 ± 2.12   |
|                           | Procyanidin 6       | 33.88 ± 3.04    | 30.89 ± 5.77   |

Values are expressed as mean ± standard error (n=5). Different lowercase letters indicate significant differences between rootstocks according to ANOVA ( $p < 0.05$ )

**Table S3.** Low-molecular-weight phenolic compounds in Syrah wines of grapes from rootstocks 5C and Gravesac

| Phenolic compounds     |                             | 5C             | GRAVESAC       |
|------------------------|-----------------------------|----------------|----------------|
| Phenolic acids (mg/kg) | Gallic acid                 | 20.46 ± 0.94 a | 14.91 ± 0.95 b |
|                        | Protocatechuic acid         | 0.35 ± 0.01 a  | 0.24 ± 0.02 b  |
|                        | Caftaric acid               | 1.62 ± 0.05 b  | 2.73 ± 0.20 a  |
|                        | <i>Cis</i> -coutaric acid   | 1.00 ± 0.04    | 1.08 ± 0.07    |
|                        | <i>Trans</i> -coutaric acid | 0.80 ± 0.03 a  | 0.52 ± 0.05 b  |
|                        | Vanillic acid               | 0.94 ± 0.00    | 0.94 ± 0.00    |
|                        | Syringic acid               | 1.63 ± 0.06 a  | 1.04 ± 0.04 b  |
|                        | Caffeic acid                | 2.42 ± 0.10    | 2.23 ± 0.07    |
|                        | <i>Cis</i> -ferulic acid    | 0.66 ± 0.03    | 0.56 ± 0.04    |
| Flavanols (mg/kg)      | Procyanidin 1               | 0.25 ± 0.01 a  | 0.20 ± 0.01 b  |
|                        | Methyl gallate              | 2.71 ± 0.09 a  | 2.25 ± 0.13 b  |
|                        | Procyanidin 2               | 7.91 ± 1.66    | 8.50 ± 0.34    |
|                        | (+)-Catechin                | 4.88 ± 0.18 a  | 3.89 ± 0.22 b  |
|                        | Procyanidin 4               | 5.71 ± 0.15 a  | 0.38 ± 0.03 b  |
|                        | Procyanidin gallate         | 12.56 ± 0.57 a | 9.59 ± 0.27 b  |
|                        | (-)-Epicatechin             | 10.46 ± 0.30 a | 8.50 ± 0.44 b  |
|                        | Procyanidin B1 gallate      | 2.44 ± 0.05 a  | 1.47 ± 0.19 b  |
|                        | Epicatechin gallate         | 0.60 ± 0.02    | 0.39 ± 0.13    |
| Flavonols (mg/kg)      | Astilbine derivative        | 0.66 ± 0.02 a  | 0.53 ± 0.03 b  |
|                        | Astilbine derivative        | 0.90 ± 0.03    | 0.82 ± 0.03    |
|                        | Rutine                      | 0.27 ± 0.02    | 0.28 ± 0.03    |
|                        | Astilbine                   | 1.75 ± 0.05    | 1.63 ± 0.08    |
|                        | Myricetin-3-O-galactoside   | 0.26 ± 0.01    | ND             |
|                        | Quercetin-3-O-galactoside   | 1.53 ± 0.05    | 1.46 ± 0.08    |
|                        | Quercetin-3-O-glucuronide   | 1.45 ± 0.06 b  | 1.89 ± 0.13 a  |
|                        | Quercetin-3-O-glucoside     | 4.34 ± 0.15    | 5.10 ± 0.28    |
|                        | Kaempferol-3-O-glucoside    | 0.65 ± 0.02    | 0.53 ± 0.06    |
|                        | Kaempferol-3-O-galactoside  | 0.07 ± 0.01    | 0.08 ± 0.01    |
|                        | Kaempferol                  | 0.19 ± 0.00 a  | 0.12 ± 0.01 b  |
|                        | Isorhamnetin-3-O-glucoside  | 0.64 ± 0.01 b  | 0.94 ± 0.94 a  |
|                        | Myricetin                   | 10.06 ± 0.34   | 9.52 ± 0.33    |
| Stilbenes (mg/kg)      | <i>Trans</i> -resveratrol   | 1.48 ± 0.04    | 1.42 ± 0.09    |

Values are expressed as mean ± standard error (n=4). Different lowercase letters indicate significant differences between rootstocks according to ANOVA ( $p < 0.05$ ).

**Table S4.** Anthocyanins in Syrah wines from rootstocks 5C and Gravesac

| Compounds                                | 5C              | GRAVESAC        |
|------------------------------------------|-----------------|-----------------|
| Delphinidin-3-glucoside                  | 27.89 ± 0.54    | 29.14 ± 0.72    |
| Cyanidin-3-glucoside                     | 9.47 ± 0.88     | 8.24 ± 0.57     |
| Petunidin-3-glucoside                    | 42.33 ± 0.23 b  | 45.57 ± 0.34 a  |
| Peonidin-3-glucoside                     | 39.93 ± 0.99 b  | 44.26 ± 0.92 a  |
| Malvidin-3-glucoside                     | 290.53 ± 6.06 a | 263.74 ± 2.63 b |
| Delphinidin-3-acetylglucoside            | 3.61 ± 0.09 b   | 3.95 ± 0.08 a   |
| Petunidin-3-acetylglucoside              | 6.24 ± 0.56     | 7.80 ± 0.62     |
| Peonidin-3-acetylglucoside               | 6.69 ± 0.11 b   | 7.45 ± 0.12 a   |
| Malvidin-3-acetylglucoside               | 39.65 ± 0.94    | 37.11 ± 0.44    |
| Cyanidin-3- <i>p</i> -coumarylglucoside  | 0.81 ± 0.05 b   | 0.97 ± 0.02 a   |
| Petunidin-3- <i>p</i> -coumarylglucoside | 3.01 ± 0.11 b   | 3.63 ± 0.05 a   |
| Peonidin-3- <i>p</i> -coumarylglucoside  | 6.07 ± 0.20 b   | 7.83 ± 0.10 a   |
| Malvidin-3- <i>p</i> -coumarylglucoside  | 21.73 ± 0.69    | 21.35 ± 0.24    |

Values are expressed as mean ± standard error (n=4). Different lowercase letters indicate significant differences between rootstocks according to ANOVA ( $p < 0.05$ ).
